# Supplementary material for: Cumulative sum learning curves guiding multicenter multidisciplinary quality improvement of EUS-guided tissue acquisition of solid pancreatic lesions
Source: PubMed Central journal article supplement — Endosc Int Open. 2022 Apr 14;10(4):E549–57. doi: 10.1055/a-1766-5259 (PMC9010081; doi:10.1055/a-1766-5259), 2022-04-14
Supplement: 2533supmat_10-1055-a-1766-5259.pdf [file 2533supmat_10-1055-a-1766-5259.pdf]

## Supplementary material

Supplementary figure 1. **RAS** CUSUM learning curve of the complete cohort.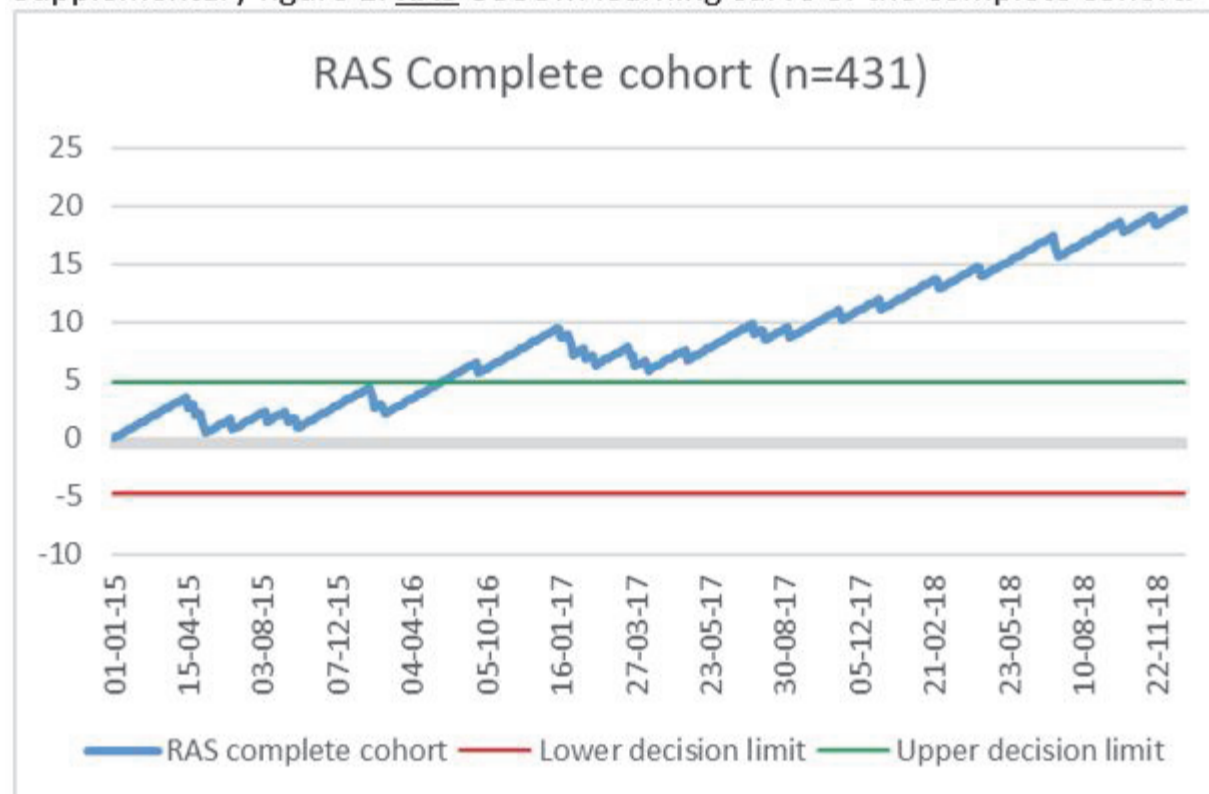

RAS: rate of adequate sample

## Supplementary material

Supplementary figure 2. **RAS** CUSUM curve of hospital A.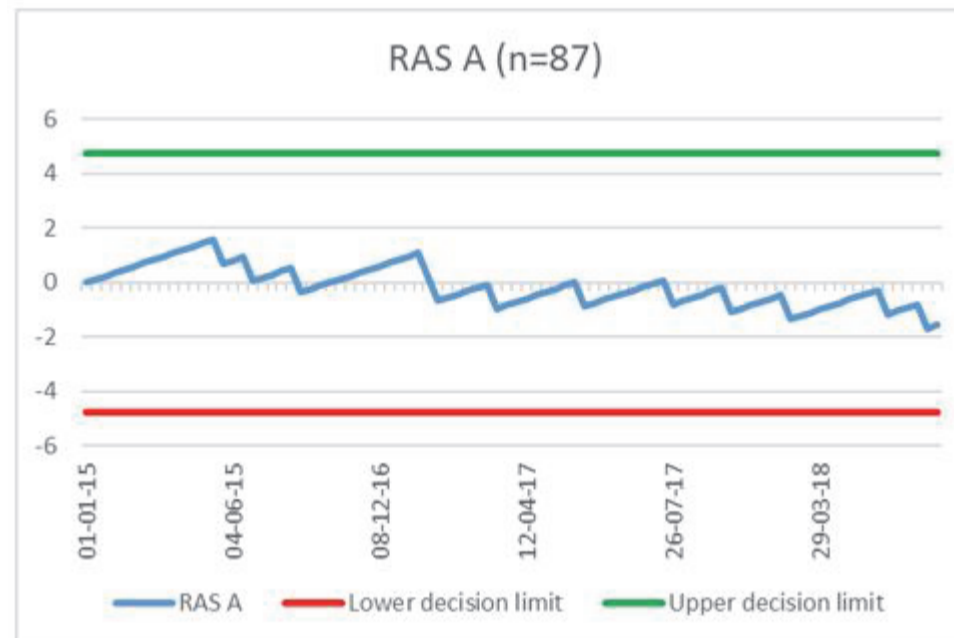

RAS: rate of adequate sample

## Supplementary material

Supplementary figure 3. **RAS** CUSUM curve of hospital B.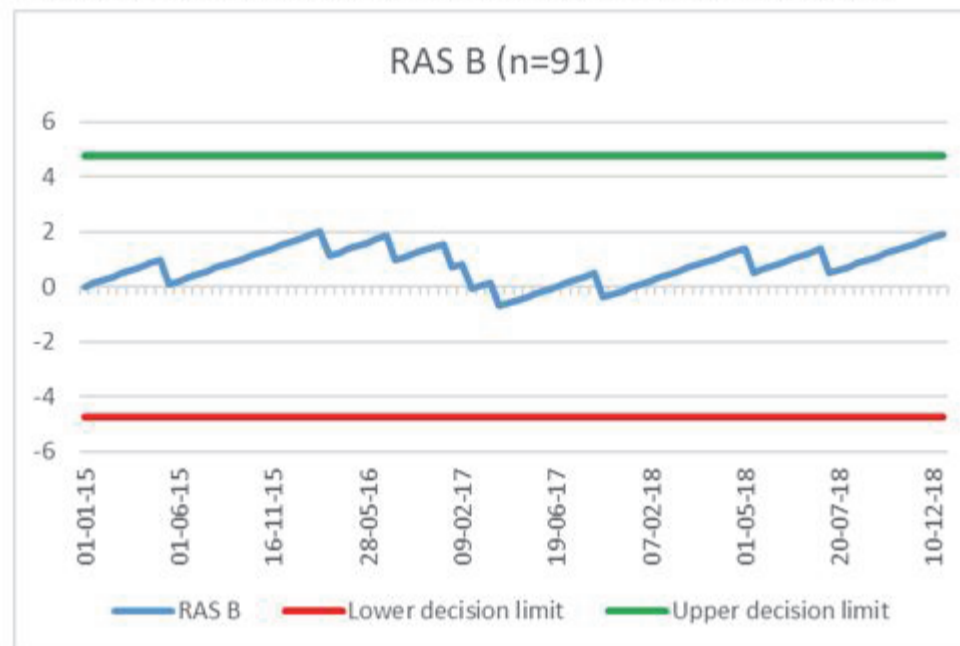

RAS: rate of adequate sample

## Supplementary material

Supplementary figure 4. **RAS** CUSUM curve of hospital C.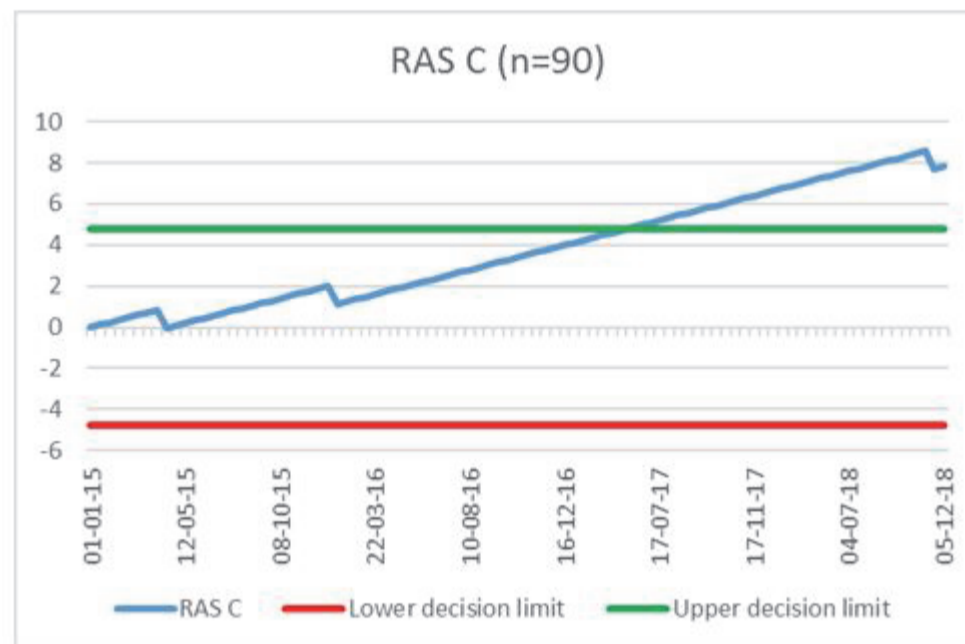

RAS: rate of adequate sample

## Supplementary material

Supplementary figure 5. **RAS** CUSUM curve of hospital D.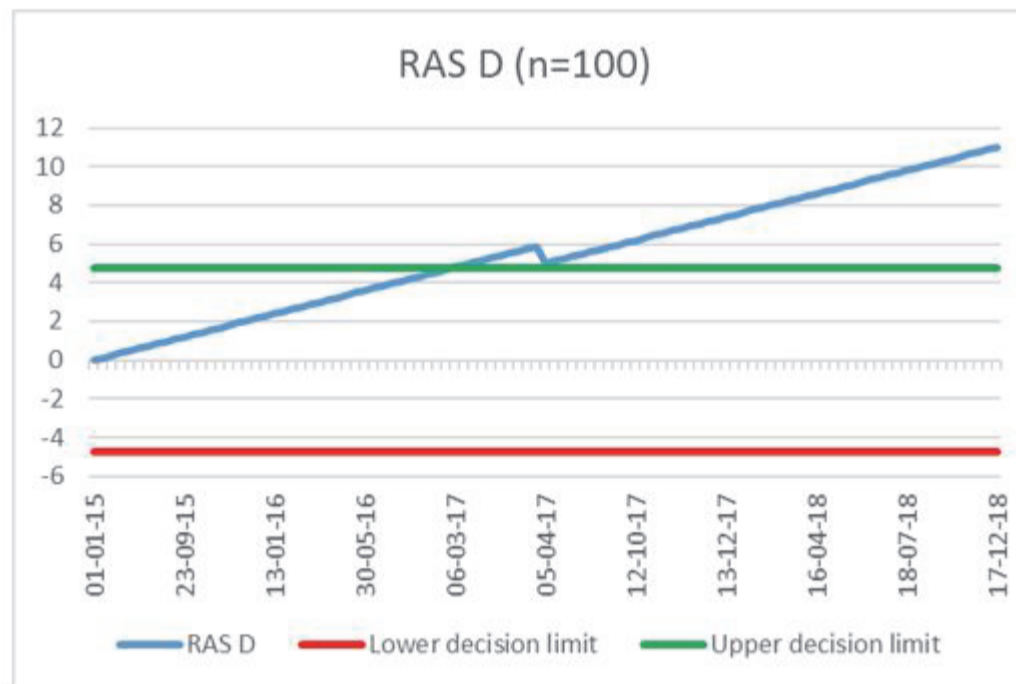

RAS: rate of adequate sample

## Supplementary material

Supplementary figure 6. **RAS** CUSUM curve of hospital E.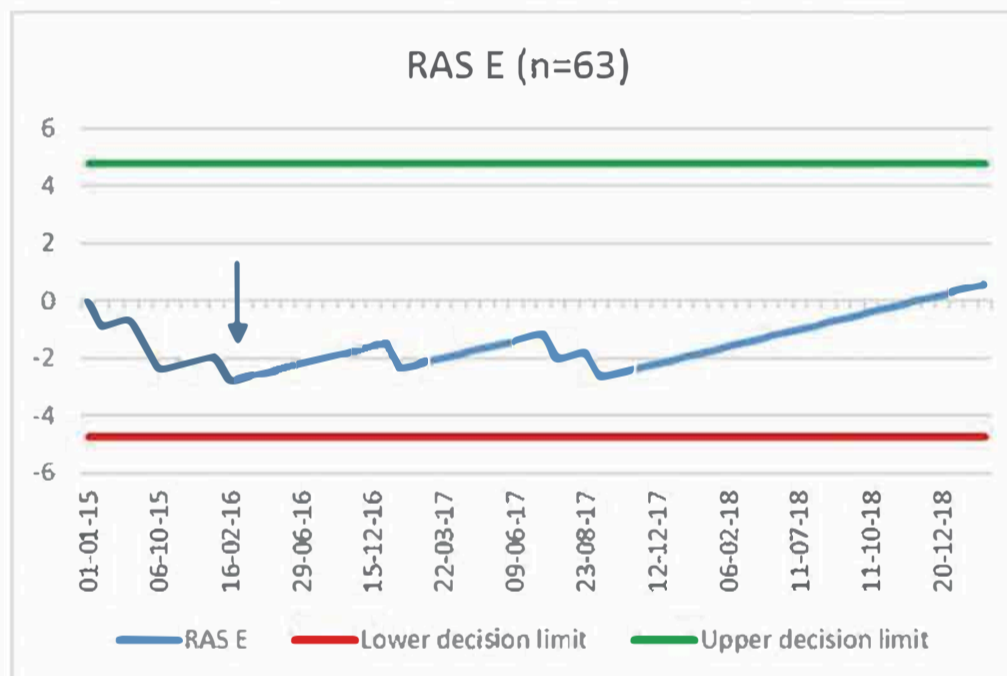

Black arrow marks the introduction of ROSE regularly.  
RAS: rate of adequate sample

## Supplementary material

Supplementary figure 7a. **DYM** CUSUM curve of hospital A.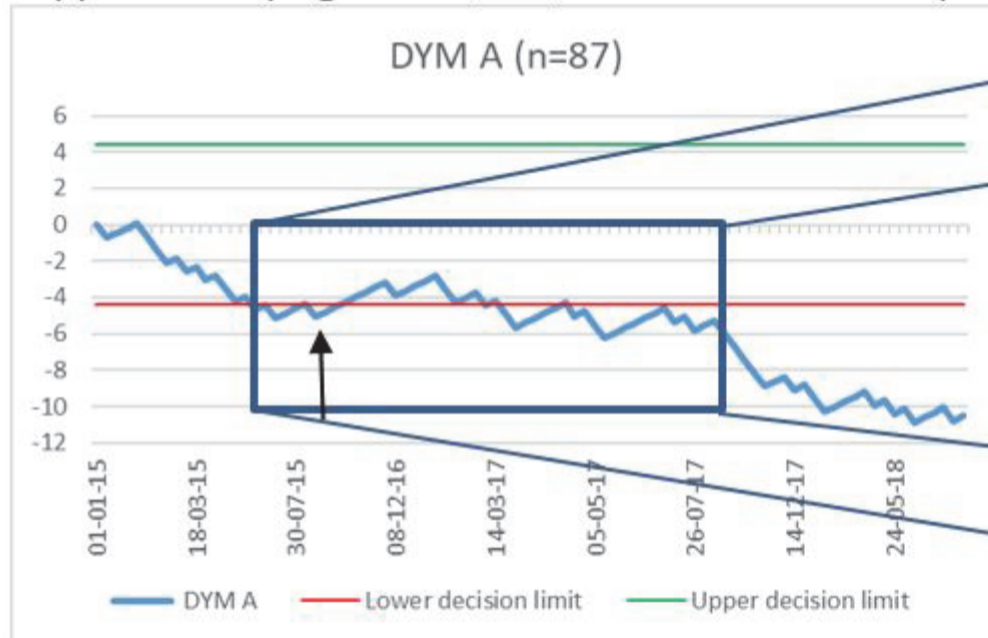

Supplementary figure 7b.

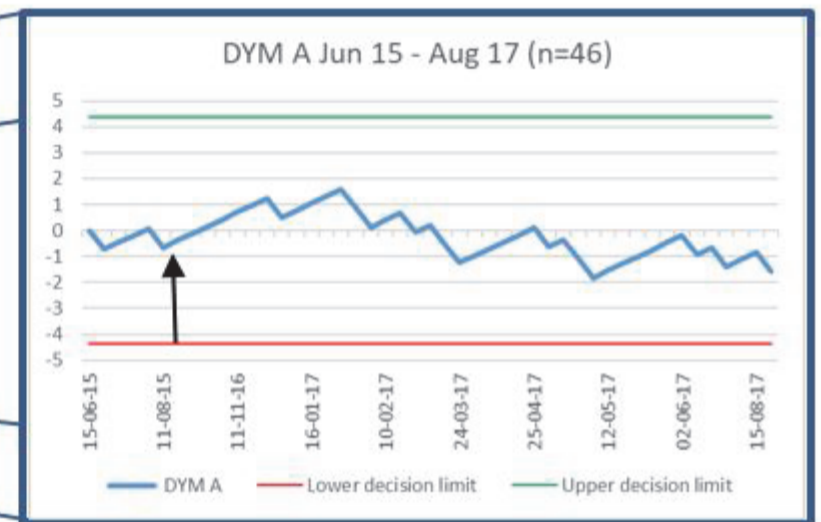

*a: period Jan 2015 – Dec 2018*

*b: period June 2015 – Aug 2017*

Black arrow marks the introduction of ROSE regularly.

DYM: diagnostic yield of malignancy

## Supplementary material

Supplementary figure 8. **DYM** CUSUM curve of hospital D.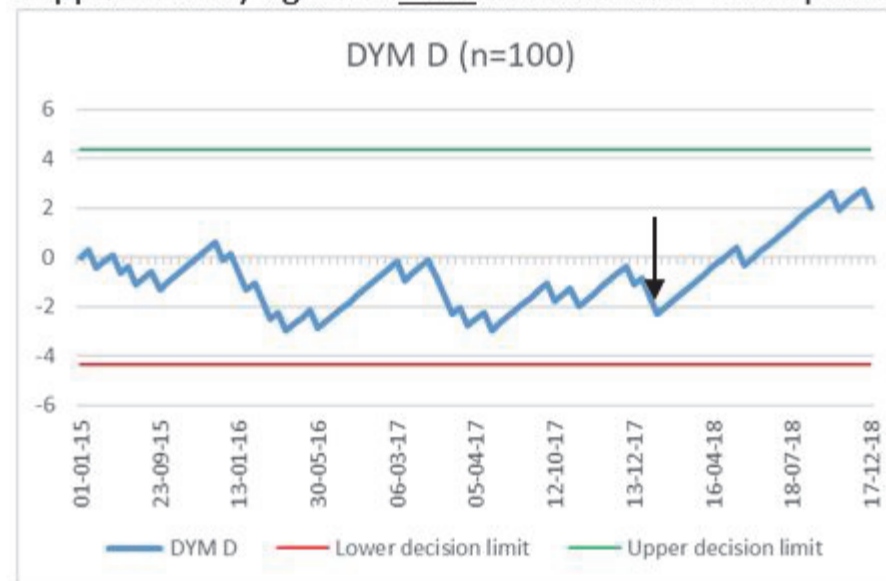

Black arrow marks the introduction of ROSE regularly.  
DYM: diagnostic yield of malignancy



## Supplementary material

Supplementary figure 9a. **DYM** CUSUM curve of hospital E.

Supplementary figure 9b.

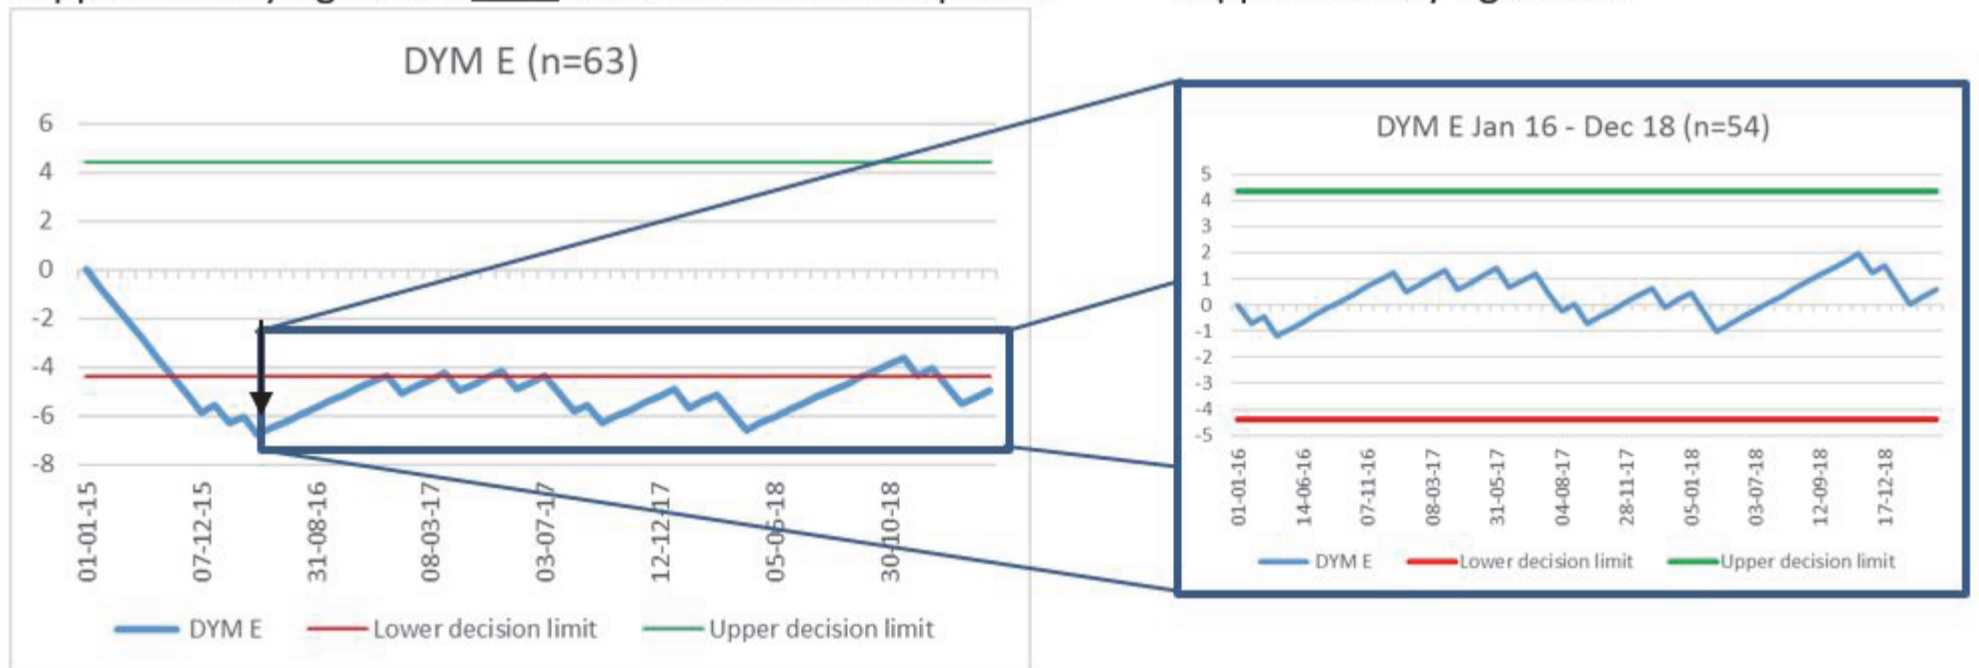

*a: period Jan 2015 – Dec 2018*

*b: period Jan 2016 – Dec 2018*

Black arrow marks the introduction of ROSE regularly

DYM: diagnostic yield of malignancy

## Supplementary material

## Supplementary tables

Supplementary table 1. RAS, rate of atypia, DYM and SFM before, during and after a period of absence of a senior pathologist in hospital C.

| Period                                   | RAS       | Rate of atypia | DYM      | SFM |
|------------------------------------------|-----------|----------------|----------|-----|
| Before 12-05-2017 (n=53)                 | 51 (96%)  | 2 (4%)         | 38 (72%) | 81% |
| Between 12-05-2017 and 12-09-2017 (n=10) | 10 (100%) | 4 (40%)        | 2 (20%)  | 40% |
| After 12-09-2017 (n=27)                  | 26 (96%)  | 3 (11%)        | 19 (70%) | 83% |

RAS: rate of adequate sample

DYM: diagnostic yield of malignancy

SFM: sensitivity for malignancy

## Supplementary material

Supplementary table 2. RAS, DYM en SFM per year, per hospital

| Period       | 2015 - 2018          |                     |                    |            | 2015                 |                     |                    |            | 2016                 |                     |                    |     | 2017                 |                     |                    |     | 2018                 |                     |                    |            |
|--------------|----------------------|---------------------|--------------------|------------|----------------------|---------------------|--------------------|------------|----------------------|---------------------|--------------------|-----|----------------------|---------------------|--------------------|-----|----------------------|---------------------|--------------------|------------|
| Hospital     | Number of procedures | RAS                 | DYM                | SFM        | Number of procedures | RAS                 | DYM                | SFM        | Number of procedures | RAS                 | DYM                | SFM | Number of procedures | RAS                 | DYM                | SFM | Number of procedures | RAS                 | DYM                | SFM        |
| A            | 87                   | <u>75</u><br>(86%)  | 53<br>(61%)        | 68%        | 23                   | <u>20</u><br>(87%)  | 12<br>(52%)        | 55%        | 8                    | <u>8</u><br>(100%)  | <u>7</u><br>(88%)  | 88% | 39                   | <u>33</u><br>(85%)  | 23<br>(59%)        | 70% | 17                   | 14<br>(82%)         | 11<br>(65%)        | 69%        |
| B            | 91                   | <u>82</u><br>(90%)  | 57<br>(63%)        | 71%        | 24                   | <u>33</u><br>(96%)  | 12<br>(50%)        | 52%        | 13                   | <u>11</u><br>(85%)  | 7<br>(54%)         | 64% | 18                   | 14<br>(78%)         | 11<br>(61%)        | 73% | 36                   | <u>34</u><br>(94%)  | <u>27</u><br>(75%) | <u>87%</u> |
| C            | 90                   | <u>87</u><br>(97%)  | 59<br>(66%)        | 79%        | 24                   | <u>23</u><br>(96%)  | <u>18</u><br>(75%) | <u>90%</u> | 27                   | <u>26</u><br>(96%)  | 18<br>(67%)        | 72% | 23                   | <u>23</u><br>(100%) | 12<br>(52%)        | 75% | 16                   | <u>15</u><br>(94%)  | 11<br>(69%)        | 79%        |
| D            | 100                  | <u>99</u><br>(99%)  | <u>75</u><br>(75%) | <u>87%</u> | 18                   | <u>18</u><br>(100%) | <u>13</u><br>(72%) | <u>87%</u> | 18                   | <u>18</u><br>(100%) | 12<br>(67%)        | 80% | 34                   | <u>33</u><br>(97%)  | <u>25</u><br>(74%) | 83% | 30                   | <u>30</u><br>(100%) | <u>25</u><br>(83%) | <u>96%</u> |
| E            | 63                   | <u>56</u><br>(89%)  | 41<br>(65%)        | 73%        | 9                    | 6<br>(67%)          | 1<br>(11%)         | 20%        | 12                   | <u>11</u><br>(92%)  | <u>10</u><br>(83%) | 83% | 22                   | <u>19</u><br>(86%)  | 15<br>(68%)        | 71% | 20                   | <u>20</u><br>(100%) | <u>15</u><br>(75%) | 83%        |
| Total cohort | 431                  | <u>399</u><br>(93%) | 285<br>(66%)       | 76%        | 98                   | <u>90</u><br>(92%)  | 56<br>(57%)        | 66%        | 78                   | <u>74</u><br>(95%)  | 54<br>(69%)        | 76% | 136                  | <u>122</u><br>(90%) | 86<br>(63%)        | 75% | 119                  | <u>113</u><br>(95%) | <u>89</u><br>(75%) | <u>85%</u> |

*Italics and underlined*: equal or above ASGE performance target.

RAS: rate of adequate sample

DYM: diagnostic yield of malignancy

SFM: sensitivity for malignancy

## Supplementary material

Supplementary table 3. Key performance indicators for both FNA and FNB.

| Needle type | Total                |     |     |     | 2015                 |     |     |     | 2016                 |     |     |     | 2017                 |     |     |     | 2018                 |     |     |     |
|-------------|----------------------|-----|-----|-----|----------------------|-----|-----|-----|----------------------|-----|-----|-----|----------------------|-----|-----|-----|----------------------|-----|-----|-----|
|             | Number of procedures | RAS | DYM | SFM | Number of procedures | RAS | DYM | SFM | Number of procedures | RAS | DYM | SFM | Number of procedures | RAS | DYM | SFM | Number of procedures | RAS | DYM | SFM |
| FNA         | 282                  | 93% | 67% | 75% | 57                   | 95% | 58% | 60% | 50                   | 96% | 72% | 80% | 93                   | 87% | 62% | 73% | 82                   | 95% | 74% | 86% |
| FNB         | 127                  | 95% | 69% | 82% | 26                   | 92% | 73% | 95% | 27                   | 96% | 67% | 72% | 39                   | 95% | 62% | 77% | 35                   | 94% | 77% | 84% |

RAS: rate of adequate sample

DYM: diagnostic yield of malignancy

SFM: sensitivity for malignancy

FNA: fine needle aspiration

FNB: fine needle biopsy
